# Supplementary material
Source: publisher site journal article supplement (https://static.cambridge.org/content/id/urn:cambridge.org:id:article:S0016756820000126/resource/name/S0016756820000126supp001.doc)
Supplement: Supplementary file 1 [file S0016756820000126supp001.doc]

Supplementary table 1 Zircon Lu–Hf isotopic data of Mangya plutons.

| Sample | Age (Ma) | 176Hf/177Hf | 2σ | 176Lu/177Hf | 2σ | 176Yb/177Hf | 2σ | *ε*Hf (0) | εHf (T) | 2σ | TDM1 | TDM2 | fLu/Hf(s) |
| --- | --- | --- | --- | --- | --- | --- | --- | --- | --- | --- | --- | --- | --- |
| CL101-01 | 504 | 0.282417 | 0.000021 | 0.000955 | 0.000005 | 0.036045 | 0.000087 | -12.57 | -1.79 | 0.73 | 1179 | 1584 | -0.97 |
| CL101-02 | 514 | 0.282469 | 0.000024 | 0.001218 | 0.000010 | 0.045556 | 0.000654 | -10.71 | 0.19 | 0.86 | 1113 | 1466 | -0.96 |
| CL101-03 | 506 | 0.282442 | 0.000021 | 0.001139 | 0.000003 | 0.042502 | 0.000188 | -11.68 | -0.91 | 0.73 | 1149 | 1530 | -0.97 |
| CL101-04 | 502 | 0.282442 | 0.000025 | 0.001064 | 0.000011 | 0.040561 | 0.000668 | -11.67 | -0.97 | 0.89 | 1147 | 1531 | -0.97 |
| CL101-05 | 513 | 0.282419 | 0.000025 | 0.000798 | 0.000033 | 0.030231 | 0.001163 | -12.50 | -1.48 | 0.89 | 1171 | 1571 | -0.98 |
| CL101-06 | 515 | 0.282425 | 0.000020 | 0.001433 | 0.000009 | 0.056358 | 0.000707 | -12.26 | -1.41 | 0.70 | 1182 | 1568 | -0.96 |
| CL101-07 | 520 | 0.282450 | 0.000025 | 0.001151 | 0.000040 | 0.043506 | 0.001747 | -11.39 | -0.32 | 0.87 | 1138 | 1504 | -0.97 |
| CL101-08 | 505 | 0.282461 | 0.000023 | 0.000582 | 0.000009 | 0.021767 | 0.000376 | -11.00 | -0.08 | 0.82 | 1106 | 1476 | -0.98 |
| CL101-09 | 518 | 0.282404 | 0.000023 | 0.000780 | 0.000008 | 0.028723 | 0.000525 | -13.02 | -1.88 | 0.83 | 1191 | 1601 | -0.98 |
| CL101-10 | 510 | 0.282498 | 0.000024 | 0.001018 | 0.000003 | 0.040875 | 0.000160 | -9.70 | 1.19 | 0.85 | 1067 | 1400 | -0.97 |
| CL108-01 | 481 | 0.282420 | 0.000017 | 0.000780 | 0.000007 | 0.029445 | 0.000250 | -12.44 | -2.09 | 0.62 | 1169 | 1586 | -0.98 |
| CL108-02 | 498 | 0.282435 | 0.000017 | 0.000820 | 0.000022 | 0.030065 | 0.000879 | -11.91 | -1.21 | 0.62 | 1149 | 1543 | -0.98 |
| CL108-03 | 487 | 0.282402 | 0.000015 | 0.000818 | 0.000013 | 0.030952 | 0.000374 | -13.09 | -2.64 | 0.54 | 1195 | 1625 | -0.98 |
| CL108-04 | 478 | 0.282445 | 0.000015 | 0.000820 | 0.000010 | 0.030614 | 0.000404 | -11.56 | -1.29 | 0.55 | 1135 | 1533 | -0.98 |
| CL108-05 | 481 | 0.282414 | 0.000016 | 0.000909 | 0.000013 | 0.033762 | 0.000641 | -12.67 | -2.36 | 0.58 | 1181 | 1603 | -0.97 |
| CL108-06 | 476 | 0.282428 | 0.000016 | 0.000914 | 0.000004 | 0.032878 | 0.000394 | -12.16 | -1.31 | 0.56 | 1153 | 1553 | -0.97 |
| CL108-07 | 502 | 0.282411 | 0.000016 | 0.000614 | 0.000004 | 0.022122 | 0.000077 | -12.16 | -1.31 | 0.56 | 1153 | 1553 | -0.98 |
| CL108-08 | 509 | 0.282378 | 0.000018 | 0.001016 | 0.000005 | 0.037200 | 0.000217 | -12.78 | -1.92 | 0.58 | 1189 | 1596 | -0.97 |
| CL108-09 | 500 | 0.282421 | 0.000017 | 0.001266 | 0.000019 | 0.047113 | 0.000883 | -13.92 | -3.33 | 0.63 | 1243 | 1679 | -0.96 |
| CL108-10 | 496 | 0.282409 | 0.000019 | 0.001336 | 0.000008 | 0.048732 | 0.000188 | -12.42 | -1.94 | 0.59 | 1185 | 1587 | -0.96 |
| CL108-11 | 512 | 0.282419 | 0.000018 | 0.001105 | 0.000015 | 0.042395 | 0.000675 | -12.84 | -1.95 | 0.67 | 1195 | 1600 | -0.97 |
| CL108-12 | 505 | 0.282454 | 0.000019 | 0.001209 | 0.000015 | 0.044567 | 0.000702 | -12.48 | -1.76 | 0.63 | 1183 | 1583 | -0.96 |
| CL108-13 | 505 | 0.282410 | 0.000018 | 0.000630 | 0.000006 | 0.023110 | 0.000121 | -11.25 | -0.35 | 0.68 | 1117 | 1494 | -0.98 |
| CL108-14 | 501 | 0.282429 | 0.000016 | 0.000769 | 0.000002 | 0.028718 | 0.000282 | -12.82 | -2.05 | 0.64 | 1183 | 1598 | -0.98 |
| CL108-15 | 480 | 0.282449 | 0.000016 | 0.000753 | 0.000005 | 0.027654 | 0.000226 | -12.12 | -1.79 | 0.55 | 1155 | 1566 | -0.98 |
| CL108-16 | 487 | 0.282411 | 0.000018 | 0.000842 | 0.000008 | 0.031264 | 0.000347 | -11.41 | -0.96 | 0.55 | 1130 | 1519 | -0.97 |
| CL108-17 | 504 | 0.282423 | 0.000019 | 0.001188 | 0.000014 | 0.044494 | 0.000699 | -12.78 | -2.08 | 0.63 | 1195 | 1602 | -0.96 |
| CL108-18 | 503 | 0.282439 | 0.000019 | 0.000912 | 0.000009 | 0.034655 | 0.000211 | -12.33 | -1.56 | 0.66 | 1168 | 1569 | -0.97 |
| CL108-19 | 506 | 0.282469 | 0.000019 | 0.001113 | 0.000034 | 0.041172 | 0.001054 | -11.76 | -0.99 | 0.68 | 1152 | 1535 | -0.97 |
| CL108-20 | 500 | 0.282452 | 0.000016 | 0.000674 | 0.000007 | 0.024989 | 0.000336 | -10.73 | 0.06 | 0.68 | 1098 | 1464 | -0.98 |
| CL108-21 | 480 | 0.282445 | 0.000019 | 0.000784 | 0.000003 | 0.029360 | 0.000108 | -11.57 | -1.24 | 0.68 | 1134 | 1532 | -0.98 |
| CL108-22 | 498 | 0.282443 | 0.000017 | 0.000654 | 0.000013 | 0.024248 | 0.000553 | -11.64 | -0.90 | 0.62 | 1133 | 1523 | -0.98 |
| CL108-23 | 487 | 0.282424 | 0.000019 | 0.000588 | 0.000004 | 0.021849 | 0.000057 | -12.32 | -1.80 | 0.68 | 1158 | 1572 | -0.98 |
| CL108-24 | 491 | 0.282435 | 0.000018 | 0.000497 | 0.000005 | 0.018417 | 0.000120 | -11.92 | -1.28 | 0.65 | 1140 | 1542 | -0.99 |
| CL108-25 | 480 | 0.282406 | 0.000015 | 0.000797 | 0.000006 | 0.029368 | 0.000325 | -12.95 | -2.64 | 0.54 | 1189 | 1620 | -0.98 |
| CL108-26 | 475 | 0.282412 | 0.000018 | 0.001007 | 0.000009 | 0.037785 | 0.000417 | -12.74 | -2.60 | 0.63 | 1187 | 1613 | -0.97 |
| CL108-27 | 474 | 0.282427 | 0.000019 | 0.000639 | 0.000011 | 0.023792 | 0.000514 | -12.18 | -1.95 | 0.68 | 1154 | 1572 | -0.98 |
| CL108-28 | 478 | 0.282454 | 0.000018 | 0.001077 | 0.000007 | 0.040482 | 0.000223 | -11.25 | -1.06 | 0.64 | 1131 | 1519 | -0.97 |
| CL108-29 | 476 | 0.282413 | 0.000017 | 0.000405 | 0.000001 | 0.015292 | 0.000055 | -12.69 | -2.33 | 0.59 | 1167 | 1598 | -0.99 |
| CL108-30 | 487 | 0.282468 | 0.000021 | 0.001500 | 0.000015 | 0.059122 | 0.000661 | -10.74 | -0.51 | 0.73 | 1123 | 1490 | -0.95 |
| CL108-31 | 474 | 0.282383 | 0.000017 | 0.000583 | 0.000002 | 0.021917 | 0.000090 | -13.76 | -3.51 | 0.61 | 1214 | 1670 | -0.98 |
| CL108-32 | 480 | 0.282419 | 0.000020 | 0.000830 | 0.000022 | 0.031026 | 0.000993 | -12.48 | -2.17 | 0.69 | 1172 | 1590 | -0.98 |
| CL140-01 | 495 | 0.282531 | 0.000021 | 0.000184 | 0.000008 | 0.005631 | 0.000336 | -8.51 | 2.33 | 0.74 | 998 | 1316 | -0.99 |
| CL140-02 | 500 | 0.282556 | 0.000019 | 0.000285 | 0.000008 | 0.008795 | 0.000206 | -7.63 | 3.29 | 0.67 | 966 | 1259 | -0.99 |
| CL140-03 | 500 | 0.282546 | 0.000019 | 0.000566 | 0.000001 | 0.021185 | 0.000096 | -8.00 | 2.83 | 0.67 | 988 | 1289 | -0.98 |
| CL140-04 | 486 | 0.282559 | 0.000024 | 0.000281 | 0.000002 | 0.009644 | 0.000092 | -7.52 | 3.09 | 0.83 | 962 | 1261 | -0.99 |
| CL140-05 | 498 | 0.282527 | 0.000024 | 0.000610 | 0.000006 | 0.023142 | 0.000318 | -8.66 | 2.11 | 0.84 | 1015 | 1333 | -0.98 |
| CL140-06 | 488 | 0.282562 | 0.000021 | 0.001149 | 0.000006 | 0.044647 | 0.000090 | -7.42 | 2.97 | 0.74 | 980 | 1271 | -0.97 |
| CL140-07 | 487 | 0.282511 | 0.000018 | 0.000346 | 0.000003 | 0.012975 | 0.000181 | -9.22 | 1.40 | 0.65 | 1030 | 1370 | -0.99 |
| CL140-08 | 497 | 0.282513 | 0.000018 | 0.000607 | 0.000004 | 0.023329 | 0.000072 | -9.16 | 1.60 | 0.65 | 1034 | 1365 | -0.98 |
| CL140-09 | 491 | 0.282582 | 0.000017 | 0.000641 | 0.000003 | 0.022188 | 0.000054 | -6.71 | 3.90 | 0.59 | 939 | 1214 | -0.98 |
| CL140-10 | 496 | 0.282569 | 0.000016 | 0.000516 | 0.000005 | 0.018411 | 0.000267 | -7.18 | 3.57 | 0.57 | 954 | 1238 | -0.98 |
| CL140-11 | 496 | 0.282518 | 0.000018 | 0.000425 | 0.000013 | 0.014781 | 0.000597 | -8.97 | 1.82 | 0.64 | 1022 | 1350 | -0.99 |
| CL140-12 | 491 | 0.282550 | 0.000016 | 0.000443 | 0.000002 | 0.015468 | 0.000127 | -7.87 | 2.80 | 0.58 | 979 | 1283 | -0.99 |
| CL140-13 | 490 | 0.282575 | 0.000015 | 0.000544 | 0.000001 | 0.018046 | 0.000070 | -6.96 | 3.65 | 0.52 | 946 | 1229 | -0.98 |
| CL140-14 | 489 | 0.282507 | 0.000015 | 0.000489 | 0.000022 | 0.014698 | 0.000638 | -9.37 | 1.24 | 0.53 | 1040 | 1381 | -0.99 |
| CL140-15 | 492 | 0.282560 | 0.000016 | 0.000350 | 0.000002 | 0.012208 | 0.000022 | -7.51 | 3.22 | 0.57 | 963 | 1258 | -0.99 |
| CL140-16 | 497 | 0.282538 | 0.000016 | 0.000419 | 0.000003 | 0.015271 | 0.000069 | -8.28 | 2.53 | 0.57 | 995 | 1305 | -0.99 |
| CL140-17 | 496 | 0.282524 | 0.000016 | 0.000375 | 0.000002 | 0.013720 | 0.000119 | -8.76 | 2.03 | 0.56 | 1013 | 1336 | -0.99 |
| CL140-18 | 494 | 0.282529 | 0.000015 | 0.000205 | 0.000002 | 0.006352 | 0.000075 | -8.61 | 2.20 | 0.54 | 1002 | 1324 | -0.99 |
| CL140-19 | 497 | 0.282560 | 0.000019 | 0.001134 | 0.000002 | 0.041696 | 0.000054 | -7.48 | 3.09 | 0.69 | 982 | 1270 | -0.97 |
| CL140-20 | 504 | 0.282545 | 0.000014 | 0.000187 | 0.000005 | 0.005898 | 0.000185 | -8.03 | 3.01 | 0.50 | 979 | 1280 | -0.99 |
| CL128-01 | 478 | 0.282491 | 0.000017 | 0.000592 | 0.000003 | 0.019989 | 0.000168 | -9.95 | 0.39 | 0.61 | 1065 | 1427 | -0.98 |
| CL128-02 | 482 | 0.282502 | 0.000016 | 0.000922 | 0.000001 | 0.030545 | 0.000173 | -9.57 | 0.75 | 0.58 | 1059 | 1407 | -0.97 |
| CL128-03 | 482 | 0.282456 | 0.000015 | 0.000318 | 0.000005 | 0.010729 | 0.000133 | -11.18 | -0.66 | 0.54 | 1105 | 1496 | -0.99 |
| CL128-04 | 483 | 0.282529 | 0.000017 | 0.000642 | 0.000005 | 0.021352 | 0.000089 | -8.59 | 1.85 | 0.59 | 1013 | 1338 | -0.98 |
| CL128-05 | 490 | 0.282475 | 0.000018 | 0.001445 | 0.000004 | 0.050766 | 0.000397 | -10.49 | -0.18 | 0.65 | 1111 | 1471 | -0.96 |
| CL128-06 | 489 | 0.282493 | 0.000017 | 0.000387 | 0.000001 | 0.011429 | 0.000068 | -9.85 | 0.78 | 0.59 | 1056 | 1410 | -0.99 |
| CL128-07 | 479 | 0.282493 | 0.000013 | 0.000509 | 0.000004 | 0.017139 | 0.000080 | -9.86 | 0.52 | 0.47 | 1059 | 1419 | -0.98 |
| CL128-08 | 480 | 0.282492 | 0.000015 | 0.001155 | 0.000010 | 0.039048 | 0.000381 | -9.89 | 0.32 | 0.52 | 1079 | 1433 | -0.97 |
| CL128-09 | 485 | 0.282494 | 0.000018 | 0.000853 | 0.000003 | 0.027629 | 0.000147 | -9.84 | 0.56 | 0.64 | 1068 | 1421 | -0.97 |
| CL128-10 | 481 | 0.282491 | 0.000011 | 0.000413 | 0.000003 | 0.013175 | 0.000060 | -9.95 | 0.52 | 0.38 | 1060 | 1421 | -0.99 |
| CL128-11 | 494 | 0.282501 | 0.000016 | 0.000383 | 0.000002 | 0.011218 | 0.000097 | -9.60 | 1.16 | 0.57 | 1046 | 1390 | -0.99 |
| CL128-12 | 488 | 0.282546 | 0.000018 | 0.001250 | 0.000030 | 0.040775 | 0.000782 | -7.98 | 2.36 | 0.62 | 1005 | 1309 | -0.96 |
| CL128-13 | 485 | 0.282506 | 0.000016 | 0.000568 | 0.000006 | 0.016072 | 0.000205 | -9.39 | 1.10 | 0.58 | 1043 | 1387 | -0.98 |
| CL128-14 | 481 | 0.282499 | 0.000016 | 0.000299 | 0.000005 | 0.008441 | 0.000098 | -9.65 | 0.84 | 0.58 | 1045 | 1400 | -0.99 |
| CL128-15 | 480 | 0.282482 | 0.000015 | 0.000379 | 0.000005 | 0.011853 | 0.000203 | -10.24 | 0.21 | 0.52 | 1071 | 1439 | -0.99 |
| CL128-16 | 481 | 0.282522 | 0.000014 | 0.000924 | 0.000003 | 0.031530 | 0.000044 | -8.84 | 1.46 | 0.50 | 1030 | 1361 | -0.97 |
| CL128-17 | 478 | 0.282490 | 0.000016 | 0.000466 | 0.000011 | 0.014046 | 0.000379 | -9.98 | 0.39 | 0.56 | 1063 | 1426 | -0.99 |
| CL128-18 | 482 | 0.282473 | 0.000016 | 0.000356 | 0.000004 | 0.011351 | 0.000125 | -10.56 | -0.06 | 0.56 | 1083 | 1458 | -0.99 |
| CL128-19 | 484 | 0.282481 | 0.000013 | 0.001018 | 0.000009 | 0.034554 | 0.000264 | -10.29 | 0.04 | 0.47 | 1090 | 1453 | -0.97 |
| CL128-20 | 492 | 0.282501 | 0.000015 | 0.000825 | 0.000009 | 0.025422 | 0.000477 | -9.58 | 0.98 | 0.54 | 1057 | 1400 | -0.98 |
| CL128-21 | 484 | 0.282494 | 0.000015 | 0.001483 | 0.000009 | 0.053835 | 0.000489 | -9.82 | 0.37 | 0.55 | 1085 | 1432 | -0.96 |
| CL128-22 | 491 | 0.282492 | 0.000017 | 0.000452 | 0.000001 | 0.012962 | 0.000034 | -9.91 | 0.76 | 0.60 | 1060 | 1413 | -0.99 |
| CL128-23 | 482 | 0.282495 | 0.000014 | 0.000391 | 0.000005 | 0.012694 | 0.000148 | -9.79 | 0.69 | 0.51 | 1053 | 1410 | -0.99 |
| CL139-01 | 475 | 0.282484 | 0.000017 | 0.000681 | 0.000004 | 0.026239 | 0.000204 | -10.19 | 0.05 | 0.60 | 1077 | 1446 | -0.98 |
| CL139-02 | 457 | 0.282510 | 0.000014 | 0.000895 | 0.000035 | 0.031486 | 0.001298 | -9.27 | 0.52 | 0.49 | 1047 | 1402 | -0.97 |
| CL139-03 | 471 | 0.282489 | 0.000014 | 0.000469 | 0.000002 | 0.015329 | 0.000056 | -10.01 | 0.22 | 0.51 | 1064 | 1432 | -0.99 |
| CL139-04 | 469 | 0.282514 | 0.000015 | 0.000798 | 0.000004 | 0.029881 | 0.000207 | -9.12 | 0.96 | 0.53 | 1038 | 1383 | -0.98 |
| CL139-05 | 471 | 0.282521 | 0.000016 | 0.001040 | 0.000017 | 0.037824 | 0.000734 | -8.88 | 1.17 | 0.55 | 1035 | 1372 | -0.97 |
| CL139-06 | 481 | 0.282490 | 0.000017 | 0.001672 | 0.000090 | 0.059422 | 0.003125 | -9.96 | 0.09 | 0.62 | 1097 | 1447 | -0.95 |
| CL139-07 | 461 | 0.282547 | 0.000013 | 0.000875 | 0.000021 | 0.029160 | 0.000784 | -7.96 | 1.92 | 0.45 | 994 | 1316 | -0.97 |
| CL139-08 | 471 | 0.282482 | 0.000014 | 0.000412 | 0.000006 | 0.013158 | 0.000231 | -10.26 | -0.03 | 0.48 | 1072 | 1447 | -0.99 |
| CL139-09 | 469 | 0.282515 | 0.000013 | 0.000755 | 0.000062 | 0.025475 | 0.002120 | -9.10 | 1.00 | 0.46 | 1036 | 1381 | -0.98 |
| CL139-10 | 477 | 0.282519 | 0.000015 | 0.000849 | 0.000001 | 0.031427 | 0.000113 | -8.94 | 1.29 | 0.54 | 1032 | 1368 | -0.97 |
| CL139-11 | 473 | 0.282574 | 0.000017 | 0.001162 | 0.000023 | 0.041721 | 0.000765 | -7.02 | 3.05 | 0.61 | 964 | 1254 | -0.97 |
| CL139-12 | 457 | 0.282487 | 0.000013 | 0.000873 | 0.000003 | 0.030112 | 0.000185 | -10.08 | -0.28 | 0.47 | 1078 | 1453 | -0.97 |
| CL139-13 | 472 | 0.282512 | 0.000014 | 0.000807 | 0.000004 | 0.030165 | 0.000224 | -9.20 | 0.94 | 0.51 | 1042 | 1387 | -0.98 |
| CL139-14 | 479 | 0.282480 | 0.000013 | 0.000697 | 0.000003 | 0.025761 | 0.000165 | -10.32 | 0.00 | 0.48 | 1083 | 1452 | -0.98 |
| CL139-15 | 464 | 0.282483 | 0.000013 | 0.001068 | 0.000009 | 0.033467 | 0.000151 | -10.20 | -0.31 | 0.48 | 1089 | 1460 | -0.97 |
| CL139-16 | 471 | 0.282511 | 0.000013 | 0.000783 | 0.000005 | 0.028786 | 0.000244 | -9.23 | 0.90 | 0.48 | 1042 | 1389 | -0.98 |
| CL139-17 | 476 | 0.282477 | 0.000013 | 0.000872 | 0.000006 | 0.030704 | 0.000255 | -10.44 | -0.24 | 0.45 | 1092 | 1464 | -0.97 |
| CL139-18 | 482 | 0.282514 | 0.000014 | 0.001533 | 0.000049 | 0.051788 | 0.001740 | -9.11 | 1.01 | 0.49 | 1058 | 1390 | -0.95 |
| CL139-19 | 477 | 0.282523 | 0.000014 | 0.000516 | 0.000016 | 0.016234 | 0.000558 | -8.80 | 1.55 | 0.51 | 1018 | 1352 | -0.98 |
| CL139-20 | 473 | 0.282525 | 0.000013 | 0.001164 | 0.000027 | 0.035711 | 0.000664 | -8.72 | 1.33 | 0.47 | 1032 | 1363 | -0.96 |
| CL139-21 | 464 | 0.282522 | 0.000014 | 0.000848 | 0.000026 | 0.029167 | 0.000979 | -8.83 | 1.13 | 0.48 | 1028 | 1369 | -0.97 |
| CL143-01 | 474 | 0.282536 | 0.000024 | 0.001198 | 0.000020 | 0.047087 | 0.000620 | -8.35 | 1.71 | 0.87 | 1018 | 1339 | -0.96 |
| CL143-02 | 483 | 0.282556 | 0.000018 | 0.000918 | 0.000005 | 0.032508 | 0.000162 | -7.63 | 2.71 | 0.63 | 982 | 1283 | -0.97 |
| CL143-03 | 481 | 0.282512 | 0.000017 | 0.000549 | 0.000004 | 0.017849 | 0.000207 | -9.19 | 1.22 | 0.60 | 1034 | 1376 | -0.98 |
| CL143-04 | 484 | 0.282546 | 0.000020 | 0.001021 | 0.000049 | 0.040706 | 0.002300 | -8.00 | 2.34 | 0.72 | 1000 | 1308 | -0.97 |
| CL143-05 | 477 | 0.282531 | 0.000017 | 0.001461 | 0.000011 | 0.056852 | 0.000278 | -8.53 | 1.52 | 0.62 | 1033 | 1354 | -0.96 |
| CL143-06 | 478 | 0.282499 | 0.000014 | 0.000613 | 0.000008 | 0.022731 | 0.000256 | -9.67 | 0.65 | 0.51 | 1055 | 1410 | -0.98 |
| CL143-07 | 479 | 0.282541 | 0.000020 | 0.001029 | 0.000003 | 0.041431 | 0.000182 | -8.17 | 2.06 | 0.70 | 1007 | 1322 | -0.97 |
| CL143-08 | 477 | 0.282526 | 0.000018 | 0.000683 | 0.000019 | 0.026573 | 0.000999 | -8.69 | 1.60 | 0.65 | 1018 | 1349 | -0.98 |
| CL143-09 | 478 | 0.282525 | 0.000019 | 0.000801 | 0.000021 | 0.030370 | 0.000779 | -8.74 | 1.54 | 0.66 | 1023 | 1354 | -0.98 |
| CL143-10 | 481 | 0.282541 | 0.000022 | 0.001136 | 0.000004 | 0.043453 | 0.000227 | -8.15 | 2.09 | 0.78 | 1009 | 1321 | -0.97 |
| CL143-11 | 487 | 0.282526 | 0.000019 | 0.001417 | 0.000016 | 0.056361 | 0.000958 | -8.69 | 1.57 | 0.66 | 1038 | 1358 | -0.96 |
| CL143-12 | 479 | 0.282545 | 0.000018 | 0.000779 | 0.000070 | 0.026606 | 0.002326 | -8.01 | 2.29 | 0.64 | 994 | 1307 | -0.98 |
| CL143-13 | 480 | 0.282533 | 0.000019 | 0.000982 | 0.000007 | 0.038101 | 0.000502 | -8.44 | 1.81 | 0.67 | 1016 | 1338 | -0.97 |
| CL143-14 | 484 | 0.282538 | 0.000019 | 0.001053 | 0.000011 | 0.041502 | 0.000308 | -8.27 | 2.06 | 0.66 | 1011 | 1325 | -0.97 |
| CL143-15 | 489 | 0.282536 | 0.000019 | 0.000928 | 0.000018 | 0.034541 | 0.000916 | -8.34 | 2.12 | 0.66 | 1011 | 1325 | -0.97 |
| CL143-16 | 477 | 0.282523 | 0.000015 | 0.000918 | 0.000005 | 0.032229 | 0.000403 | -8.80 | 1.41 | 0.54 | 1029 | 1361 | -0.97 |
| CL143-17 | 471 | 0.282545 | 0.000021 | 0.000942 | 0.000018 | 0.036411 | 0.000643 | -8.02 | 2.05 | 0.76 | 999 | 1316 | -0.97 |
| CL143-18 | 484 | 0.282512 | 0.000017 | 0.000983 | 0.000006 | 0.034163 | 0.000347 | -9.20 | 1.13 | 0.59 | 1046 | 1383 | -0.97 |
| CL143-19 | 473 | 0.282511 | 0.000020 | 0.000833 | 0.000023 | 0.032775 | 0.001079 | -9.23 | 0.91 | 0.73 | 1043 | 1389 | -0.97 |
| CL143-20 | 474 | 0.282495 | 0.000017 | 0.000731 | 0.000002 | 0.028335 | 0.000085 | -9.80 | 0.41 | 0.62 | 1063 | 1422 | -0.98 |
| CL143-21 | 485 | 0.282529 | 0.000019 | 0.000613 | 0.000002 | 0.020246 | 0.000161 | -8.61 | 1.87 | 0.67 | 1013 | 1338 | -0.98 |
| CL137-01 | 464 | 0.282482 | 0.000018 | 0.001025 | 0.000022 | 0.037321 | 0.000810 | -10.25 | -0.36 | 0.64 | 1089 | 1463 | -0.97 |
| CL137-02 | 437 | 0.282536 | 0.000017 | 0.001041 | 0.000016 | 0.038567 | 0.000789 | -8.34 | 0.98 | 0.59 | 1014 | 1358 | -0.97 |
| CL137-03 | 457 | 0.282512 | 0.000016 | 0.000521 | 0.000015 | 0.017661 | 0.000456 | -9.19 | 0.72 | 0.56 | 1033 | 1390 | -0.98 |
| CL137-04 | 460 | 0.282519 | 0.000017 | 0.001179 | 0.000008 | 0.045005 | 0.000280 | -8.96 | 0.80 | 0.60 | 1042 | 1387 | -0.96 |
| CL137-05 | 438 | 0.282476 | 0.000018 | 0.001524 | 0.000014 | 0.057319 | 0.000237 | -10.45 | -1.27 | 0.64 | 1112 | 1500 | -0.95 |
| CL137-06 | 440 | 0.282489 | 0.000016 | 0.001294 | 0.000014 | 0.049028 | 0.000712 | -10.00 | -0.69 | 0.55 | 1087 | 1466 | -0.96 |
| CL137-07 | 455 | 0.282500 | 0.000015 | 0.000293 | 0.000004 | 0.009446 | 0.000095 | -9.62 | 0.31 | 0.54 | 1044 | 1414 | -0.99 |
| CL137-08 | 459 | 0.282477 | 0.000017 | 0.000402 | 0.000005 | 0.012405 | 0.000196 | -10.45 | -0.46 | 0.60 | 1079 | 1466 | -0.99 |
| CL137-09 | 456 | 0.282514 | 0.000021 | 0.001575 | 0.000026 | 0.059193 | 0.001225 | -9.12 | 0.43 | 0.76 | 1060 | 1406 | -0.95 |
| CL137-10 | 449 | 0.282494 | 0.000018 | 0.000726 | 0.000021 | 0.027430 | 0.000836 | -9.83 | -0.16 | 0.65 | 1064 | 1439 | -0.98 |
| CL137-11 | 443 | 0.282506 | 0.000017 | 0.001200 | 0.000015 | 0.047476 | 0.000910 | -9.42 | -0.02 | 0.60 | 1061 | 1426 | -0.96 |
| CL137-12 | 449 | 0.282523 | 0.000019 | 0.001309 | 0.000016 | 0.050131 | 0.000563 | -8.81 | 0.69 | 0.66 | 1040 | 1385 | -0.96 |
| CL137-13 | 456 | 0.282534 | 0.000018 | 0.000775 | 0.000008 | 0.028251 | 0.000333 | -8.41 | 1.40 | 0.65 | 1009 | 1346 | -0.98 |
| CL137-14 | 456 | 0.282485 | 0.000017 | 0.000664 | 0.000012 | 0.023191 | 0.000377 | -10.14 | -0.30 | 0.60 | 1074 | 1453 | -0.98 |
| CL137-15 | 458 | 0.282514 | 0.000017 | 0.000810 | 0.000009 | 0.031069 | 0.000467 | -9.14 | 0.70 | 0.60 | 1039 | 1392 | -0.98 |
| CL137-16 | 450 | 0.282491 | 0.000018 | 0.001263 | 0.000012 | 0.047978 | 0.000641 | -9.93 | -0.39 | 0.64 | 1083 | 1455 | -0.96 |
| CL137-17 | 457 | 0.282506 | 0.000016 | 0.000704 | 0.000016 | 0.025225 | 0.000517 | -9.39 | 0.45 | 0.55 | 1046 | 1407 | -0.98 |
| CL137-18 | 453 | 0.282551 | 0.000017 | 0.000717 | 0.000007 | 0.025833 | 0.000387 | -7.81 | 1.96 | 0.60 | 984 | 1308 | -0.98 |
| CL137-19 | 459 | 0.282460 | 0.000019 | 0.000696 | 0.000008 | 0.025590 | 0.000266 | -11.03 | -1.15 | 0.67 | 1111 | 1509 | -0.98 |
| CL137-20 | 445 | 0.282509 | 0.000025 | 0.001155 | 0.000016 | 0.044083 | 0.000528 | -9.29 | 0.17 | 0.89 | 1055 | 1416 | -0.97 |
| CL133-01 | 437 | 0.282501 | 0.000034 | 0.004894 | 0.000044 | 0.197607 | 0.001938 | -9.58 | -1.39 | 1.21 | 1184 | 1507 | -0.85 |
| CL133-02 | 432 | 0.282539 | 0.000021 | 0.002196 | 0.000033 | 0.091290 | 0.001124 | -8.25 | 0.64 | 0.76 | 1042 | 1375 | -0.93 |
| CL133-03 | 440 | 0.282530 | 0.000018 | 0.001350 | 0.000042 | 0.056032 | 0.001474 | -8.54 | 0.74 | 0.65 | 1030 | 1375 | -0.96 |
| CL133-04 | 435 | 0.282490 | 0.000020 | 0.002049 | 0.000022 | 0.082446 | 0.001120 | -9.97 | -0.99 | 0.70 | 1108 | 1481 | -0.94 |
| CL133-05 | 442 | 0.282559 | 0.000027 | 0.002764 | 0.000035 | 0.107907 | 0.001518 | -7.55 | 1.38 | 0.95 | 1029 | 1336 | -0.92 |
| CL133-06 | 441 | 0.282498 | 0.000016 | 0.001629 | 0.000028 | 0.069380 | 0.001489 | -9.69 | -0.47 | 0.56 | 1085 | 1452 | -0.95 |
| CL133-07 | 438 | 0.282530 | 0.000020 | 0.002508 | 0.000056 | 0.106517 | 0.002118 | -8.57 | 0.35 | 0.72 | 1064 | 1398 | -0.92 |
| CL133-08 | 430 | 0.282584 | 0.000024 | 0.003845 | 0.000019 | 0.166747 | 0.001091 | -6.65 | 1.72 | 0.87 | 1023 | 1305 | -0.88 |
| CL133-09 | 435 | 0.282546 | 0.000023 | 0.003086 | 0.000078 | 0.120525 | 0.003050 | -8.00 | 0.68 | 0.82 | 1058 | 1375 | -0.91 |
| CL133-10 | 446 | 0.282474 | 0.000018 | 0.001390 | 0.000025 | 0.052370 | 0.000835 | -10.54 | -1.15 | 0.64 | 1112 | 1499 | -0.96 |
| CL133-11 | 441 | 0.282434 | 0.000017 | 0.001116 | 0.000008 | 0.046094 | 0.000453 | -11.95 | -2.57 | 0.59 | 1159 | 1586 | -0.97 |
| CL133-12 | 431 | 0.282457 | 0.000021 | 0.002325 | 0.000027 | 0.080778 | 0.000570 | -11.13 | -2.32 | 0.74 | 1164 | 1561 | -0.93 |
| CL133-13 | 427 | 0.282529 | 0.000029 | 0.004930 | 0.000069 | 0.217394 | 0.003426 | -8.58 | -0.58 | 1.04 | 1141 | 1448 | -0.85 |
| CL102-01 | 417 | 0.282660 | 0.000015 | 0.001293 | 0.000004 | 0.050140 | 0.000080 | -3.97 | 4.85 | 0.52 | 845 | 1096 | -0.96 |
| CL102-02 | 414 | 0.282705 | 0.000020 | 0.001903 | 0.000015 | 0.075942 | 0.000673 | -2.36 | 6.24 | 0.72 | 794 | 1006 | -0.94 |
| CL102-03 | 424 | 0.282659 | 0.000017 | 0.001647 | 0.000007 | 0.063833 | 0.000446 | -3.99 | 4.89 | 0.61 | 854 | 1100 | -0.95 |
| CL102-04 | 417 | 0.282699 | 0.000019 | 0.002111 | 0.000011 | 0.082923 | 0.000327 | -2.58 | 6.03 | 0.66 | 807 | 1022 | -0.94 |
| CL102-05 | 413 | 0.282687 | 0.000025 | 0.001384 | 0.000010 | 0.053342 | 0.000657 | -3.01 | 5.71 | 0.90 | 809 | 1039 | -0.96 |
| CL102-06 | 428 | 0.282721 | 0.000022 | 0.001484 | 0.000014 | 0.058897 | 0.000287 | -1.81 | 7.19 | 0.79 | 762 | 956 | -0.96 |
| CL102-08 | 420 | 0.282658 | 0.000025 | 0.001686 | 0.000017 | 0.067279 | 0.000284 | -4.04 | 4.73 | 0.87 | 857 | 1106 | -0.95 |
| CL102-09 | 429 | 0.282681 | 0.000024 | 0.001605 | 0.000007 | 0.062820 | 0.000161 | -3.22 | 5.76 | 0.85 | 822 | 1047 | -0.95 |
| CL102-10 | 425 | 0.282626 | 0.000026 | 0.001674 | 0.000009 | 0.066634 | 0.000352 | -5.18 | 3.70 | 0.93 | 903 | 1175 | -0.95 |
| CL102-11 | 416 | 0.282691 | 0.000025 | 0.001511 | 0.000006 | 0.060393 | 0.000241 | -2.86 | 5.89 | 0.88 | 805 | 1029 | -0.95 |
| CL102-12 | 421 | 0.282683 | 0.000029 | 0.001568 | 0.000005 | 0.062157 | 0.000490 | -3.14 | 5.69 | 1.04 | 818 | 1046 | -0.95 |
| CL102-14 | 418 | 0.282712 | 0.000026 | 0.001155 | 0.000005 | 0.045211 | 0.000459 | -2.14 | 6.76 | 0.94 | 769 | 976 | -0.97 |
| CL102-15 | 415 | 0.282636 | 0.000027 | 0.001352 | 0.000003 | 0.052443 | 0.000163 | -4.82 | 3.95 | 0.94 | 881 | 1153 | -0.96 |
| CL102-17 | 423 | 0.282676 | 0.000025 | 0.001645 | 0.000005 | 0.065222 | 0.000539 | -3.39 | 5.46 | 0.87 | 830 | 1062 | -0.95 |
| CL106-01 | 410 | 0.282670 | 0.000017 | 0.001440 | 0.000003 | 0.059647 | 0.000128 | -3.59 | 5.04 | 0.59 | 833 | 1079 | -0.96 |
| CL106-02 | 411 | 0.282658 | 0.000015 | 0.001699 | 0.000006 | 0.070071 | 0.000423 | -4.04 | 4.53 | 0.55 | 857 | 1112 | -0.95 |
| CL106-03 | 413 | 0.282672 | 0.000017 | 0.001032 | 0.000009 | 0.040361 | 0.000095 | -3.54 | 5.28 | 0.60 | 822 | 1066 | -0.97 |
| CL106-04 | 409 | 0.282669 | 0.000017 | 0.001517 | 0.000009 | 0.062681 | 0.000510 | -3.63 | 4.95 | 0.59 | 837 | 1083 | -0.95 |
| CL106-5 | 408 | 0.282687 | 0.000015 | 0.001335 | 0.000002 | 0.054582 | 0.000136 | -3.01 | 5.62 | 0.53 | 808 | 1041 | -0.96 |
| CL106-6 | 410 | 0.282657 | 0.000015 | 0.001425 | 0.000003 | 0.058687 | 0.000150 | -4.05 | 4.59 | 0.54 | 852 | 1108 | -0.96 |
| CL106-7 | 410 | 0.282688 | 0.000013 | 0.001540 | 0.000001 | 0.063666 | 0.000158 | -2.98 | 5.62 | 0.46 | 811 | 1042 | -0.95 |
| CL106-8 | 413 | 0.282670 | 0.000014 | 0.001388 | 0.000002 | 0.057233 | 0.000158 | -3.59 | 5.12 | 0.49 | 832 | 1076 | -0.96 |
| CL106-9 | 406 | 0.282675 | 0.000016 | 0.002109 | 0.000010 | 0.088685 | 0.000160 | -3.41 | 4.96 | 0.56 | 841 | 1081 | -0.94 |
| CL106-10 | 414 | 0.282691 | 0.000017 | 0.001431 | 0.000003 | 0.058307 | 0.000239 | -2.85 | 5.86 | 0.59 | 803 | 1029 | -0.96 |
| CL106-11 | 411 | 0.282683 | 0.000014 | 0.001451 | 0.000017 | 0.059761 | 0.000547 | -3.16 | 5.48 | 0.49 | 816 | 1051 | -0.96 |
| CL106-12 | 410 | 0.282661 | 0.000013 | 0.001288 | 0.000008 | 0.053969 | 0.000148 | -3.93 | 4.74 | 0.46 | 843 | 1098 | -0.96 |
| CL106-13 | 404 | 0.282653 | 0.000017 | 0.001583 | 0.000021 | 0.072938 | 0.001436 | -4.20 | 4.28 | 0.61 | 861 | 1123 | -0.95 |
| CL106-14 | 413 | 0.282678 | 0.000014 | 0.001330 | 0.000001 | 0.055143 | 0.000234 | -3.31 | 5.42 | 0.48 | 820 | 1057 | -0.96 |
| CL106-15 | 408 | 0.282703 | 0.000014 | 0.001414 | 0.000002 | 0.058972 | 0.000275 | -2.45 | 6.14 | 0.49 | 787 | 1007 | -0.96 |
| CL106-16 | 413 | 0.282693 | 0.000014 | 0.001347 | 0.000003 | 0.055967 | 0.000300 | -2.79 | 5.94 | 0.48 | 799 | 1024 | -0.96 |
| CL106-17 | 409 | 0.282654 | 0.000015 | 0.001028 | 0.000006 | 0.041569 | 0.000428 | -4.19 | 4.54 | 0.53 | 848 | 1110 | -0.97 |
| CL106-18 | 409 | 0.282677 | 0.000016 | 0.001417 | 0.000006 | 0.057940 | 0.000377 | -3.37 | 5.25 | 0.55 | 824 | 1065 | -0.96 |
| CL106-19 | 407 | 0.282659 | 0.000015 | 0.001261 | 0.000003 | 0.052164 | 0.000219 | -4.01 | 4.60 | 0.52 | 846 | 1105 | -0.96 |
| CL106-20 | 408 | 0.282675 | 0.000012 | 0.001402 | 0.000002 | 0.057530 | 0.000194 | -3.44 | 5.16 | 0.44 | 826 | 1070 | -0.96 |
